# Supplementary material
Source: publisher figshare collection journal article supplement (https://frontiersin.figshare.com/ndownloader/files/24191447)
Supplement: Supplementary file [file 24191447]

A

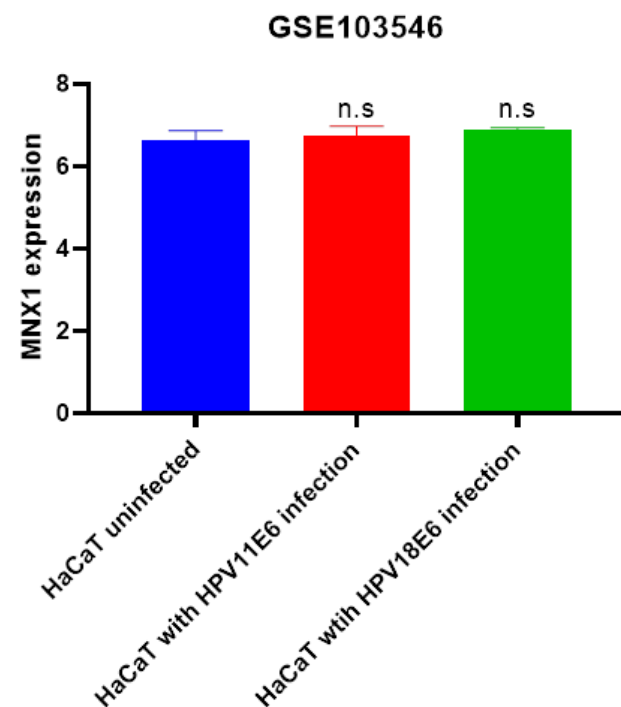

B

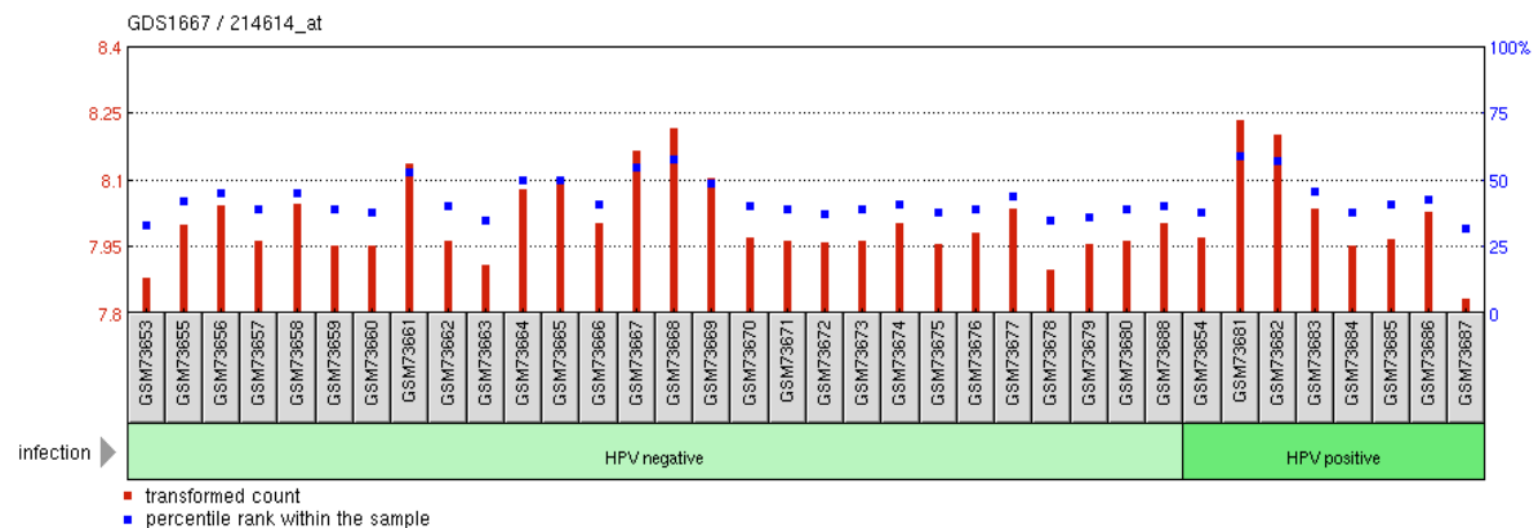

FigureS1: The relationship between MNX1 and HPV viral infection. A. In GSE103546, there were no significant changes in the expression of MNX1 (NM\_005515) in HaCat cells infected with HPV11E6 or HPV18E6. B. In GSE3292 (GDS1667), head and neck squamous cell carcinoma (HNSCC) tumors with positive or negative of human papilloma virus (HPV) showed no expression differences of MNX1.
